# Supplementary material
Source: Springer Nature journal article supplement (https://www.springermedizin.de/resource/supplementary/13045_2013_330_MOESM1_ESM.pdf/9661146)

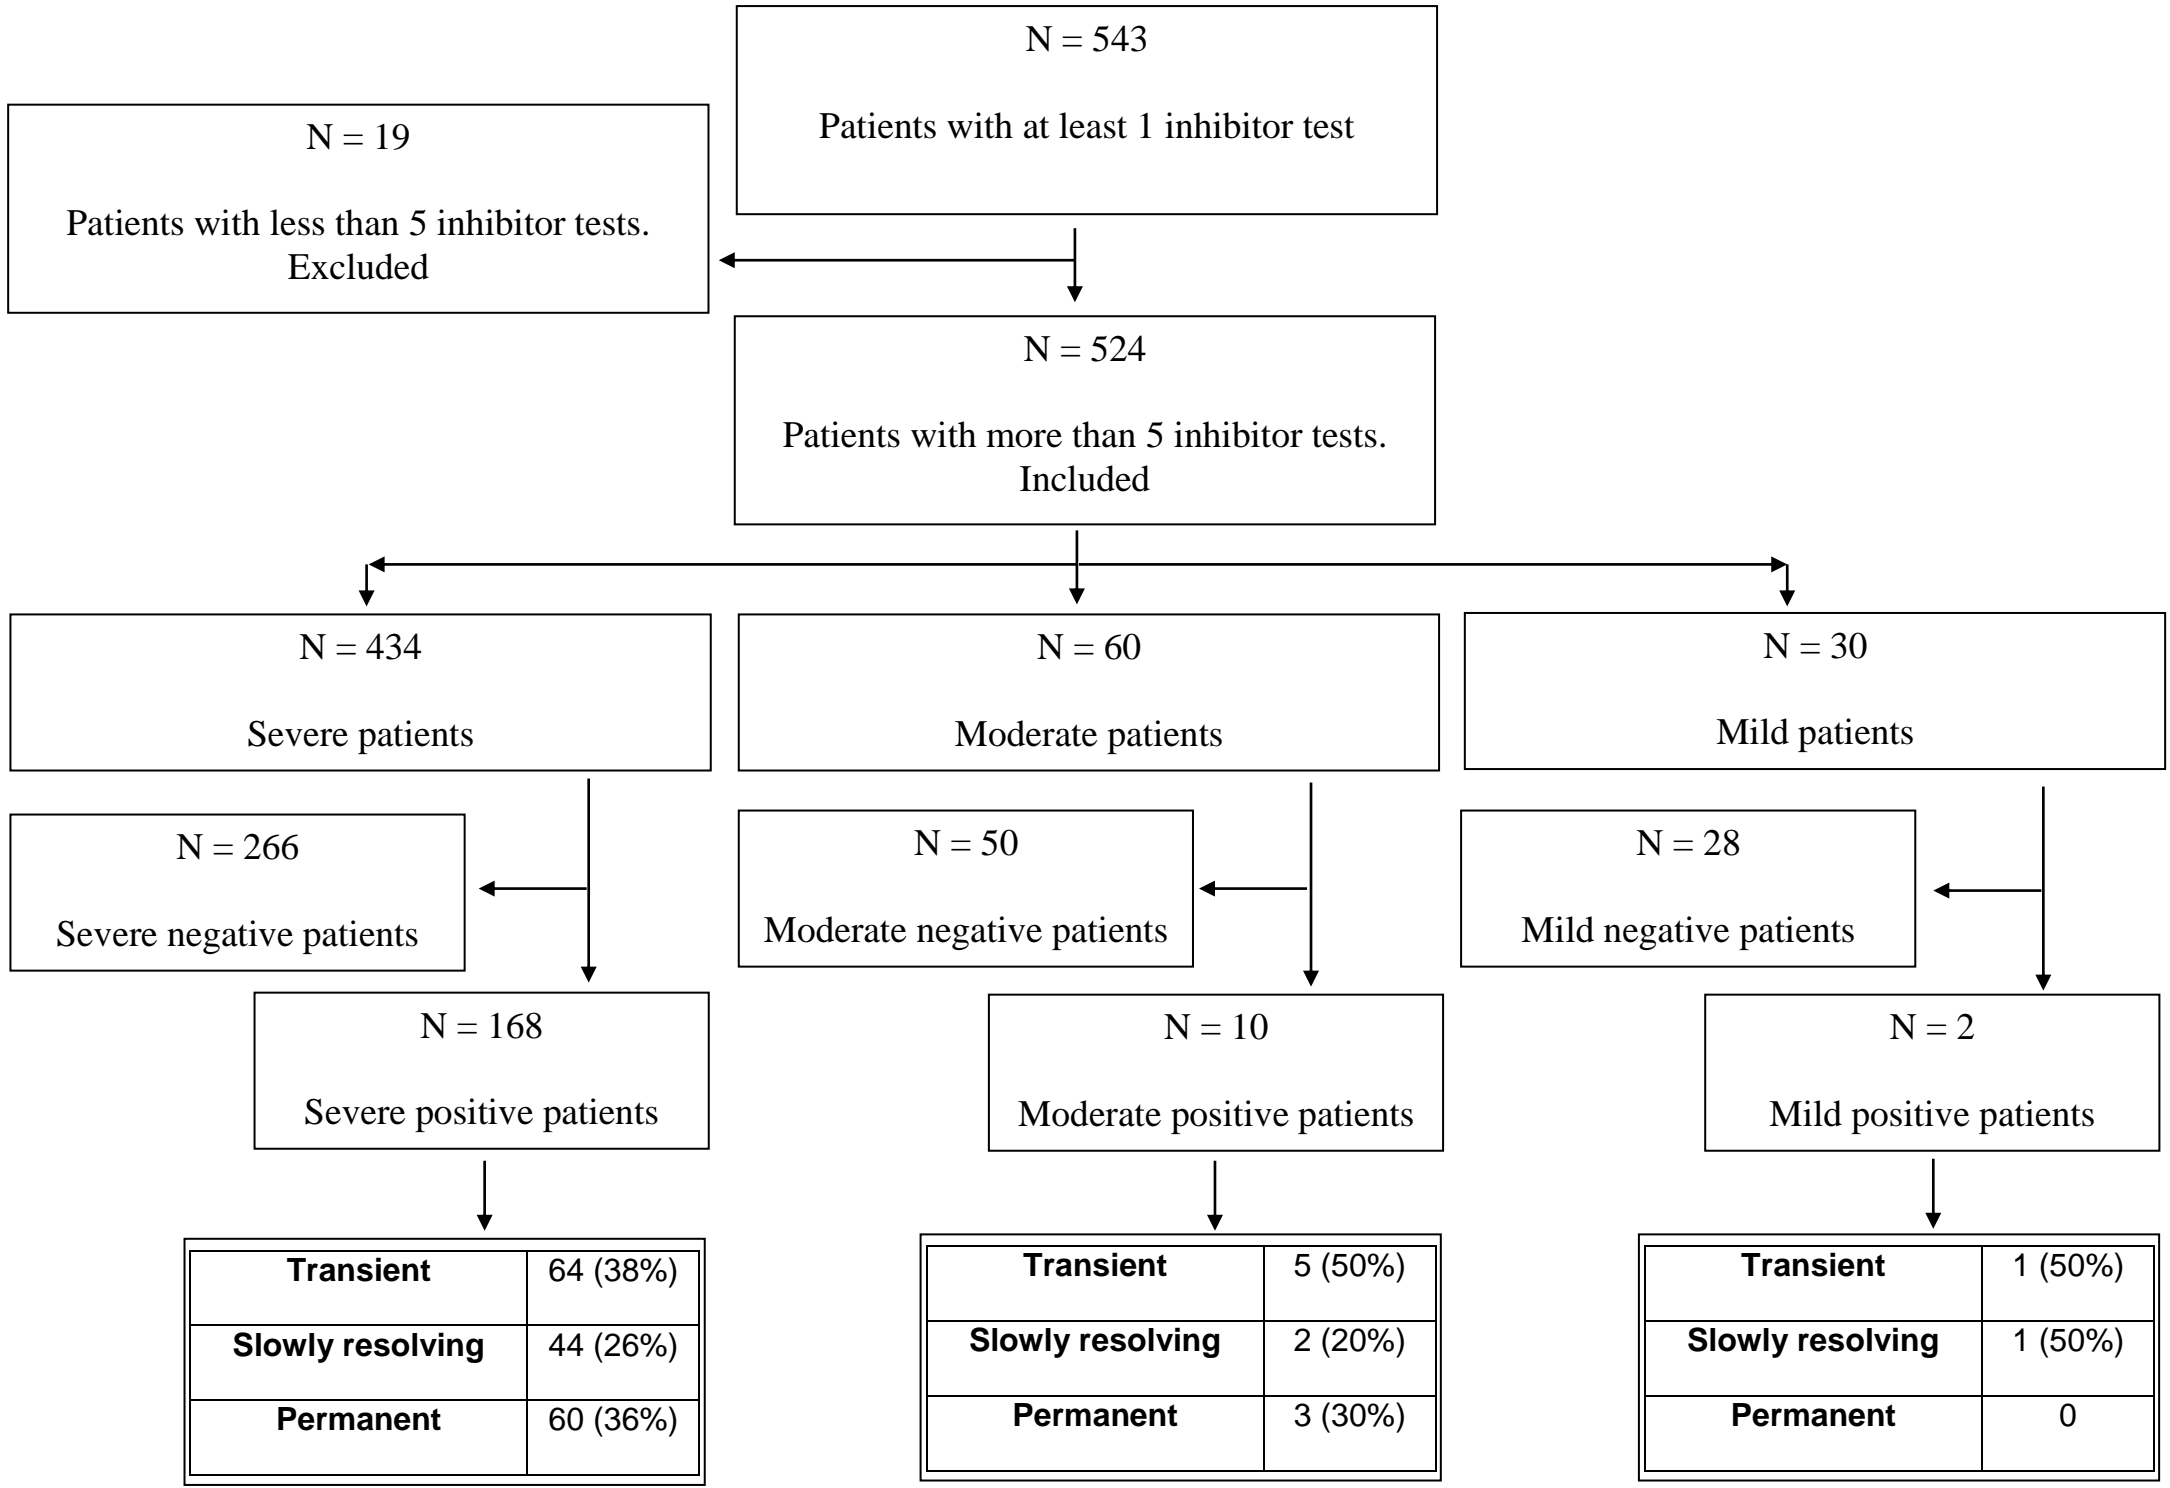

Supplement: MOESM1 [file 9661146]
